# Supplementary material
Source: MDPI journal article supplement (https://www.mdpi.com/2673-8112/1/2/37)
Supplement: s1 [file s1]

## Supplementary material

Table S1: Numerical test results of virucidal activity against SARS-CoV-2

|                                          | CPC as free active substance                        |        | CPC/BH as free active substance                     |        | BH/CPC lozenge                                      |        | Placebo lozenge                                     |        | Control                                             |        |
|------------------------------------------|-----------------------------------------------------|--------|-----------------------------------------------------|--------|-----------------------------------------------------|--------|-----------------------------------------------------|--------|-----------------------------------------------------|--------|
| High concentration (dissolved in 4ml)    |                                                     |        |                                                     |        |                                                     |        |                                                     |        |                                                     |        |
| Time (min)                               | log <sub>10</sub> ( c )<br>(TCID <sub>50</sub> /ml) | 95% CI | log <sub>10</sub> ( c )<br>(TCID <sub>50</sub> /ml) | 95% CI | log <sub>10</sub> ( c )<br>(TCID <sub>50</sub> /ml) | 95% CI | log <sub>10</sub> ( c )<br>(TCID <sub>50</sub> /ml) | 95% CI | log <sub>10</sub> ( c )<br>(TCID <sub>50</sub> /ml) | 95% CI |
| 0                                        | 8.94                                                | 0.89   | 8.99                                                | 0.67   | 8.94                                                | 0.89   | 8.99                                                | 0.67   | 8.99                                                | 0.67   |
| 1                                        | 8.94                                                | 0.75   | 7.43                                                | 0.54   | 4.63                                                | 0.33   | 9.24                                                | 0.76   | /                                                   | /      |
| 5                                        | 7.07                                                | 0.61   | 4.50                                                | 0.00   | 4.50                                                | 0.00   | 6.99                                                | 0.63   | /                                                   | /      |
| 15                                       | 4.00                                                | 0.00   | 4.50                                                | 0.00   | 4.50                                                | 0.00   | 6.12                                                | 0.50   | 9.12                                                | 0.71   |
| cytotoxic level                          | 3.50                                                | /      | 4.50                                                | /      | 4.50                                                | /      | 4.50                                                | /      | /                                                   | /      |
| Medium concentration (dissolved in 20ml) |                                                     |        |                                                     |        |                                                     |        |                                                     |        |                                                     |        |
| Time (min)                               | log <sub>10</sub> ( c )<br>(TCID <sub>50</sub> /ml) | 95% CI | log <sub>10</sub> ( c )<br>(TCID <sub>50</sub> /ml) | 95% CI | log <sub>10</sub> ( c )<br>(TCID <sub>50</sub> /ml) | 95% CI | log <sub>10</sub> ( c )<br>(TCID <sub>50</sub> /ml) | 95% CI | log <sub>10</sub> ( c )<br>(TCID <sub>50</sub> /ml) | 95% CI |
| 0                                        | 8.50                                                | 0.68   | 9.68                                                | 0.67   | 8.50                                                | 0.68   | 9.68                                                | 0.67   | 9.68                                                | 0.67   |
| 1                                        | 8.44                                                | 0.72   | 7.72                                                | 0.67   | 6.81                                                | 0.68   | 8.87                                                | 0.63   | /                                                   | /      |
| 5                                        | 7.75                                                | 0.71   | 6.38                                                | 0.69   | 4.94                                                | 0.53   | 8.62                                                | 0.71   | /                                                   | /      |
| 15                                       | 6.06                                                | 0.40   | 4.32                                                | 0.37   | 3.50                                                | 0.00   | 9.03                                                | 0.81   | 9.78                                                | 0.77   |
| cytotoxic level                          | 3.50                                                | /      | 3.50                                                | /      | 3.50                                                | /      | 3.50                                                | /      | /                                                   | /      |
| Low concentration (dissolved in 30ml)    |                                                     |        |                                                     |        |                                                     |        |                                                     |        |                                                     |        |
| Time (min)                               | log <sub>10</sub> ( c )<br>(TCID <sub>50</sub> /ml) | 95% CI | log <sub>10</sub> ( c )<br>(TCID <sub>50</sub> /ml) | 95% CI | log <sub>10</sub> ( c )<br>(TCID <sub>50</sub> /ml) | 95% CI | log <sub>10</sub> ( c )<br>(TCID <sub>50</sub> /ml) | 95% CI | log <sub>10</sub> ( c )<br>(TCID <sub>50</sub> /ml) | 95% CI |
| 0                                        | 9.76                                                | 0.79   | 9.95                                                | 0.67   | 9.76                                                | 0.79   | 9.95                                                | 0.67   | 9.95                                                | 0.67   |
| 1                                        | 9.44                                                | 0.74   | 9.06                                                | 0.79   | 8.88                                                | 0.78   | 10.07                                               | 0.83   | /                                                   | /      |
| 5                                        | 9.06                                                | 0.68   | 8.37                                                | 0.73   | 8.57                                                | 0.65   | 9.49                                                | 0.72   | /                                                   | /      |
| 15                                       | 8.07                                                | 0.67   | 7.51                                                | 0.66   | 6.75                                                | 0.69   | 8.49                                                | 0.71   | 8.93                                                | 0.65   |
| cytotoxic level                          | 3.50                                                | /      | 3.50                                                | /      | 3.50                                                | /      | 3.50                                                | /      | /                                                   | /      |

*CPC – cetylpyridinium chloride; BH – benzydamine hydrochloride; CI – confidence interval*

**Table S2:** Test product concentrations with pH values and log reduction of infective virus concentration for each of the contact times.

|                                                | CPC as free active substance                                           | CPC/BH as free active substance | BH/CPC lozenge | Placebo lozenge |
|------------------------------------------------|------------------------------------------------------------------------|---------------------------------|----------------|-----------------|
| <b>High concentration (disolved in 4ml)</b>    |                                                                        |                                 |                |                 |
| pH value                                       | 7.61                                                                   | 7.80                            | 2.85           | 2.99            |
| Time (min)                                     | $\Delta\log_{10}(c) \text{ (TCID}_{50}/\text{ml)} \pm 95\% \text{ CI}$ |                                 |                |                 |
| 1                                              | -0.00±1.06                                                             | -1.57±0.86                      | -4.32±0.82     | +0.25±1.01      |
| 5                                              | -1.88±0.96                                                             | -4.49±0.67                      | -4.44±0.75     | -2.00±0.92      |
| 15                                             | -4.94±0.75                                                             | -4.49±0.67                      | -4.44±0.75     | -2.88±0.83      |
| <b>Medium concentration (disolved in 20ml)</b> |                                                                        |                                 |                |                 |
| pH value                                       | 7.66                                                                   | 7.73                            | 4.2            | 4.45            |
| Time (min)                                     | $\Delta\log_{10}(c) \text{ (TCID}_{50}/\text{ml)} \pm 95\% \text{ CI}$ |                                 |                |                 |
| 1                                              | -0.06±0.99                                                             | -1.96±0.95                      | -1.69±0.96     | -0.81±0.92      |
| 5                                              | -0.75±0.98                                                             | -3.30±0.96                      | -3.56±0.86     | -1.06±0.98      |
| 15                                             | -2.44±0.79                                                             | -5.36±0.77                      | -5.00±0.68     | -0.65±1.05      |
| <b>Low concentration (disolved in 30ml)</b>    |                                                                        |                                 |                |                 |
| pH value                                       | 7.67                                                                   | 7.80                            | 4.64           | 5.25            |
| Time (min)                                     | $\Delta\log_{10}(c) \text{ (TCID}_{50}/\text{ml)} \pm 95\% \text{ CI}$ |                                 |                |                 |
| 1                                              | -0.32±1.08                                                             | -0.89±1.03                      | -0.88±1.11     | +0.13±1.06      |
| 5                                              | -0.70±1.04                                                             | -1.58±0.98                      | -1.19±1.03     | -0.46±0.98      |
| 15                                             | -1.69±1.03                                                             | -2.44±0.94                      | -3.01±1.05     | -1.46±0.97      |

*CPC – cetylpyridinium chloride; BH – benzydamine hydrochloride; CI – confidence interval*
